# Supplementary material
Source: PubMed Central journal article supplement (PMC4963279)
Supplement: NIHMS797294-supplement-Author_addition_approval_1.pdf [file NIHMS797294-supplement-Author_addition_approval_1.pdf]

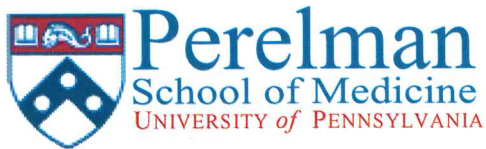

**Garret A. FitzGerald, M.D., F.R.S.**  
Chair, Department of Systems  
Pharmacology and Translational  
Therapeutics  
Director, Institute for Translational  
Medicine and Therapeutics (ITMAT)  
McNeil Professor in Translational  
Medicine and Therapeutics

May 5, 2016

Thomas Michel, MD, PhD  
Associate Editor

Dear Dr. Michel,

We have added new authors, James Monslow, PhD, Leslie Todd, BS, and Ellen Puré, PhD, from the Department of Animal Biology, School of Veterinary Medicine, University of Pennsylvania, to our revised manuscript CIRCULATIONAHA/2016/022308. All authors confirmed and authorized the addition of the new authors.

Sincerely yours,

A handwritten signature in blue ink, appearing to be "Garret A. FitzGerald", written over a horizontal line.

Garret A. FitzGerald, MD, FRS

Soon Yew Tang

A handwritten signature in blue ink, appearing to be "Soon Yew Tang", written over a horizontal line.

Sven-Christian Pawelzik

A handwritten signature in blue ink, appearing to be "Sven-Christian Pawelzik", written over a horizontal line.

Lihong Chen

A handwritten signature in blue ink, appearing to be "Lihong Chen", written over a horizontal line.

John Lawson

A handwritten signature in blue ink, appearing to be "John Lawson", written over a horizontal line.
