# Supplementary material
Source: PubMed Central journal article supplement (PMC4963279)
Supplement: NIHMS797294-supplement-Author_addition_approval_2.pdf [file NIHMS797294-supplement-Author_addition_approval_2.pdf]

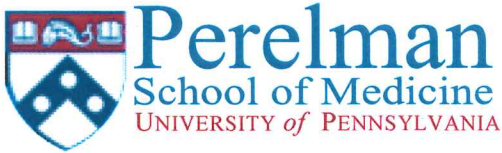

**Garret A. FitzGerald, M.D., F.R.S.**  
Chair, Department of Systems  
Pharmacology and Therapeutics  
Director, Institute for Translational Medicine  
and Therapeutics (ITMAT)  
McNeil Professor in Translational  
Medicine and Therapeutics

May 5, 2016

Thomas Michel, MD, PhD

Associate Editor

Dear Dr. Michel,

We have added a new author, Gregory R. Grant, PhD, from the Department of Genetics, University of Pennsylvania, to our revised manuscript CIRCULATIONAHA/2016/022308. All authors confirmed and authorized the addition of the new author.

Sincerely yours,

A handwritten signature in blue ink, appearing to read "Garret A. FitzGerald".

Garret A. FitzGerald, MD, FRS

Soon Yew Tang

A handwritten signature in blue ink, appearing to read "Soon Yew Tang".

James Monslow

A handwritten signature in blue ink, appearing to read "James Monslow".

Leslie Todd

A handwritten signature in blue ink, appearing to read "Leslie Todd".

Sven-Christian Pawelzik

A handwritten signature in blue ink, appearing to read "Sven-Christian Pawelzik".

Lihong Chen

A handwritten signature in blue ink, appearing to read "Lihong Chen".

John Lawson

A handwritten signature in blue ink, appearing to read "John Lawson".

Ellen Puré

A handwritten signature in blue ink, appearing to read "Ellen Puré".
