# Supplementary material
Source: PubMed Central journal article supplement (PMC4963279)
Supplement: NIHMS797294-supplement-Supplemental_Material.pdf [file NIHMS797294-supplement-Supplemental_Material.pdf]

**Cardiovascular Consequences of Prostanoid I Receptor Deletion in Microsomal  
Prostaglandin E Synthase-1 Deficient Hyperlipidemic Mice**

<sup>1</sup>Soon Yew Tang, PhD; <sup>2</sup>James Monslow, PhD; <sup>1,3</sup>Gregory R. Grant, PhD; <sup>2</sup>Leslie Todd, BS;  
<sup>1</sup>Sven-Christian Pawelzik, PhD; <sup>1</sup>Lihong Chen, MD, PhD; <sup>1</sup>John Lawson, MS; <sup>2</sup>Ellen Puré, PhD;  
<sup>1</sup>\*Garret A. FitzGerald, MD

<sup>1</sup>From the Institute for Translational Medicine and Therapeutics, Perelman School of Medicine,  
Department of Systems Pharmacology and Translational Therapeutics, <sup>2</sup>Department of Animal  
Biology, School of Veterinary Medicine, <sup>3</sup>Department of Genetics, University of Pennsylvania,  
Philadelphia, Pennsylvania, 19104-5127.

\*Address for correspondence: Garret A. FitzGerald, University of Pennsylvania, Perelman  
School of Medicine, 10-110 Smilow Center for Translational Research, 3400 Civic Center Blvd,  
Bldg 421, Philadelphia, PA 19104-5158. Fax: 215-573-9135 Tel: 215-898-1184 Email:  
[garret@upenn.edu](mailto:garret@upenn.edu)

Subject code: Vascular Disease

## Supplemental Figures

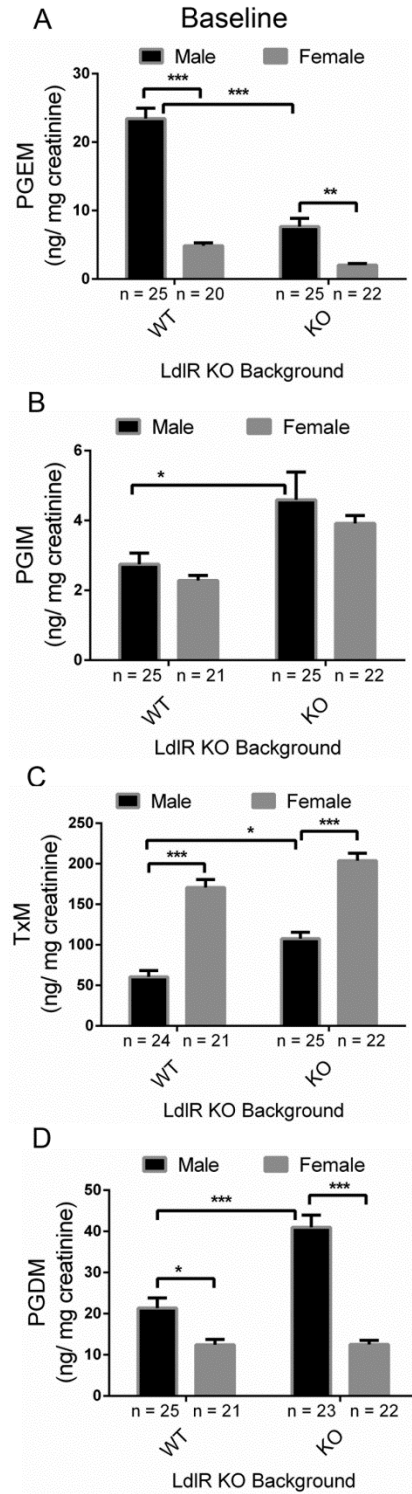

**Supplemental Figure 1. Impact of prostacyclin receptor (Ip) and microsomal prostaglandin**

**E synthase 1 (mPges-1) deletion on prostaglandin biosynthesis in mice.** Fasting (9am-5 pm)

urine samples from LdlR KO (WT) and Ip/mPges-1/ LdlR TKO (KO) mice were collected

before feeding a HFD, and prostanoids metabolites were analyzed by liquid chromatography/

mass spectrometry, as described in the Methods. Deletion of Ip and mPges-1 suppressed PGE<sub>2</sub>

but increased PGI<sub>2</sub> biosynthesis as reflected in their urinary PGEM (7-hydroxy-5, 11-

diketotetranorpropane-1, 16-dioic acid) (A) and PGIM (2, 3-dinor 6-keto PGF<sub>1α</sub>) (B)

metabolites, respectively. Urinary 2, 3-dinor TxB<sub>2</sub> (TxM) was also elevated in TKO mutants in

both sexes (C). PGDM (11, 15-dioxo-9α-hydroxy-2,3,4,5-tetranorprostan-1,20-dioic acid) levels

in male mice were augmented in the TKO mutants (D). PGDM levels in female were not

changed. Two-way ANOVA showed a significant effect of genotype and/ or gender on urinary

prostanoid levels (PGEM, genotype,  $p < 0.0001$ , gender,  $p < 0.0001$ , interaction,  $p < 0.0001$ ;

PGIM, genotype,  $p = 0.0005$ , gender,  $p = 0.2363$ , interaction,  $p = 0.8289$ ; TxM, genotype,  $p <$

$0.0001$ , gender,  $p < 0.0001$ , interaction,  $p = 0.4178$ ; PGDM, genotype,  $p < 0.0001$ , gender,  $p <$

$0.0001$ , interaction,  $p < 0.0001$ ). Multiple comparison tests (Holm-Sidak) were used to test

significant differences between WT (LdlR KO) and KO (Ip/mPges-1/ LdlR TKOs). Data are

expressed as means  $\pm$  SEMs. \* $p < 0.05$ , \*\* $p < 0.01$ , \*\*\* $p < 0.001$ ; n=20-25 (male) and female (22-

25) per genotype.

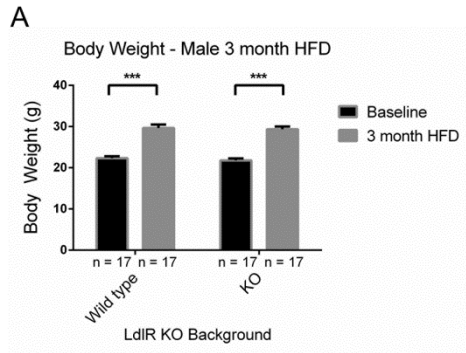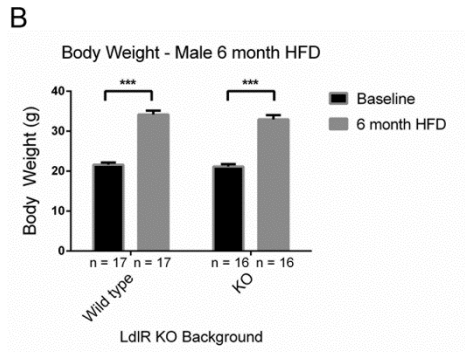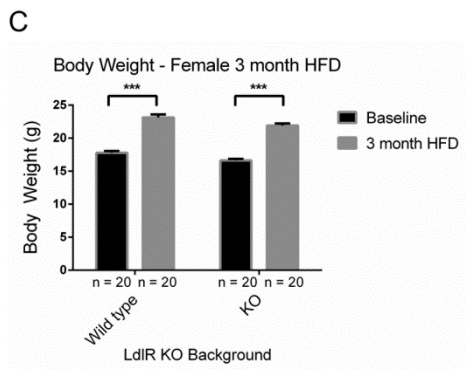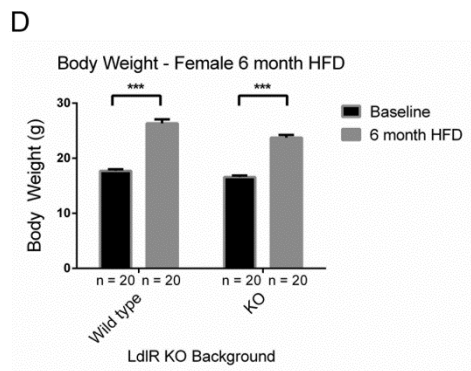

**Supplemental Figure 2. Body weight of mice.** Both male (A- 3 months, B- 6 months) and female (C- 3 months, D- 6 months) mice were weighed before and after feeding a HFD. Two-

way ANOVA revealed a significant increase in body weight after 3 or 6 months on a HFD in both sexes (A- male- 3 month HFD, genotype,  $p= 0.5897$ , treatment,  $p< 0.0001$ , interaction,  $p= 0.7651$ ; B- male- 6 month HFD, genotype,  $p= 0.4068$ , treatment,  $p< 0.0001$ , interaction,  $p= 0.4880$ ; C- female- 3 month HFD, genotype,  $p= 0.4068$ , treatment,  $p< 0.0001$ , interaction,  $p= 0.8638$ ; D- female- 6 month HFD, genotype,  $p= 0.0014$ , treatment,  $p< 0.0001$ , interaction,  $p= 0.0788$ ). No significant differences were detected between WT and KOs. Data are expressed as means  $\pm$  SEMs.  $*p<0.0001$ ; n= 16-17 (male) and 20 (female) per genotype.

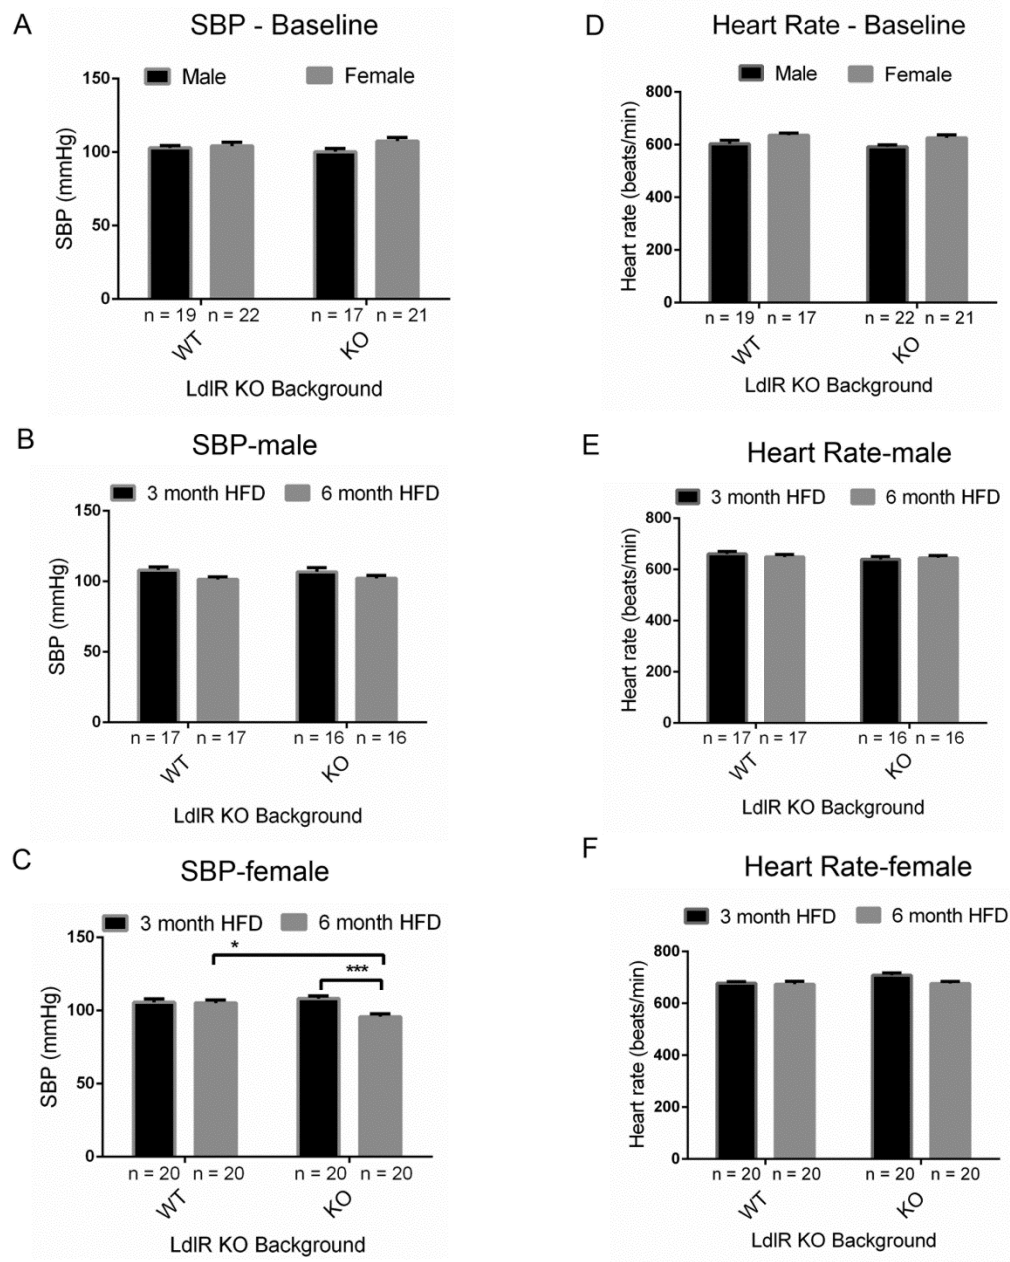

**Supplemental Figure 3. Impact of *Ip* and *mPges-1* deletion on systolic blood pressure (SBP)**

**and heart rate of mice on a high fat diet. (A-C) SBP of male and female mice were measured**

using a tail-cuff system before (A- baseline, male and female) and after feeding a HFD for 3

months or 6 months (B- male, C- female). Two-way ANOVA revealed no significant difference

in baseline SBP between WT (Ldlr KO) and KO (*Ip/mPges-1*/ Ldlr TKOs) in both sexes

(genotype,  $p= 0.8491$ , gender,  $p= 0.0607$ , interaction,  $p= 0.1873$ ) and male mice after 3 or 6 month HFD (genotype,  $p= 0.9150$ , treatment,  $p= 0.0159$ , interaction,  $p= 0.6703$ ). SBP of female KOs was significantly reduced at 6 month HFD compared to WT (genotype,  $p= 0.0844$ , treatment,  $p= 0.0016$ , interaction,  $p= 0.0037$ ). Heart rate of mice was also measured simultaneously (D-baseline, male and female, E- male and F- female, 3 or 6 month HFD). No significant difference was detected between WT (LdlR KO) and KO (Ip/mPges-1/ LdlR TKOs) at baseline (genotype,  $p= 0.3213$ , gender,  $p= 0.0023$ , interaction,  $p= 0.9508$ ) and in both sexes after HFD feeding (male- genotype,  $p= 0.1999$ , treatment,  $p= 0.7728$ , interaction,  $p= 0.3450$ ; female- genotype,  $p= 0.0511$ , treatment,  $p= 0.0414$ , interaction,  $p= 0.1069$ ). Data are expressed as means  $\pm$  SEMs.  $*p<0.05$ ,  $***p<0.0001$ ;  $n=17-22$  (male) and  $16-22$  (female) per genotype.

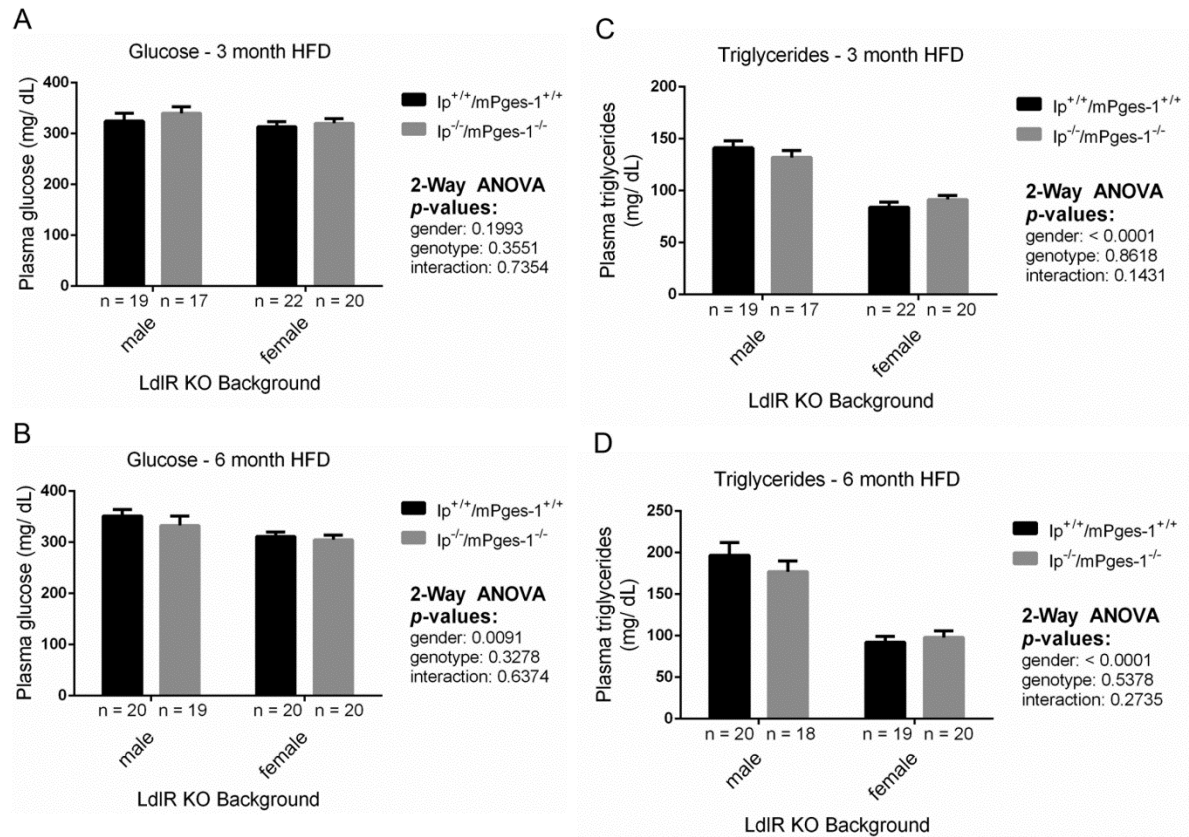

**Supplemental Figure 4. Impact of Ip and mPges-1 deletion on fasting plasma glucose and triglyceride levels of mice on a high fat diet.** Fasting plasma glucose and triglyceride levels were measured using commercial test kit from Stanbio laboratory following manufacturer's instructions. Two-way ANOVA revealed no significant effect of genotype on plasma glucose and triglyceride levels in both male and female mice after feeding a HFD for 3 or 6 months (glucose- 3 month HFD, genotype,  $p = 0.3551$ , gender,  $p = 0.1993$ , interaction,  $p = 0.7354$ ; glucose- 6 month HFD, genotype,  $p = 0.3278$ , gender,  $p = 0.0091$ , interaction,  $p = 0.6374$ ; triglycerides- 3 month HFD, genotype,  $p = 0.8618$ , gender,  $p < 0.0001$ , interaction,  $p = 0.1431$ ; triglycerides- 6 month HFD, genotype,  $p = 0.5378$ , gender,  $p < 0.0001$ , interaction,  $p = 0.2735$ ).



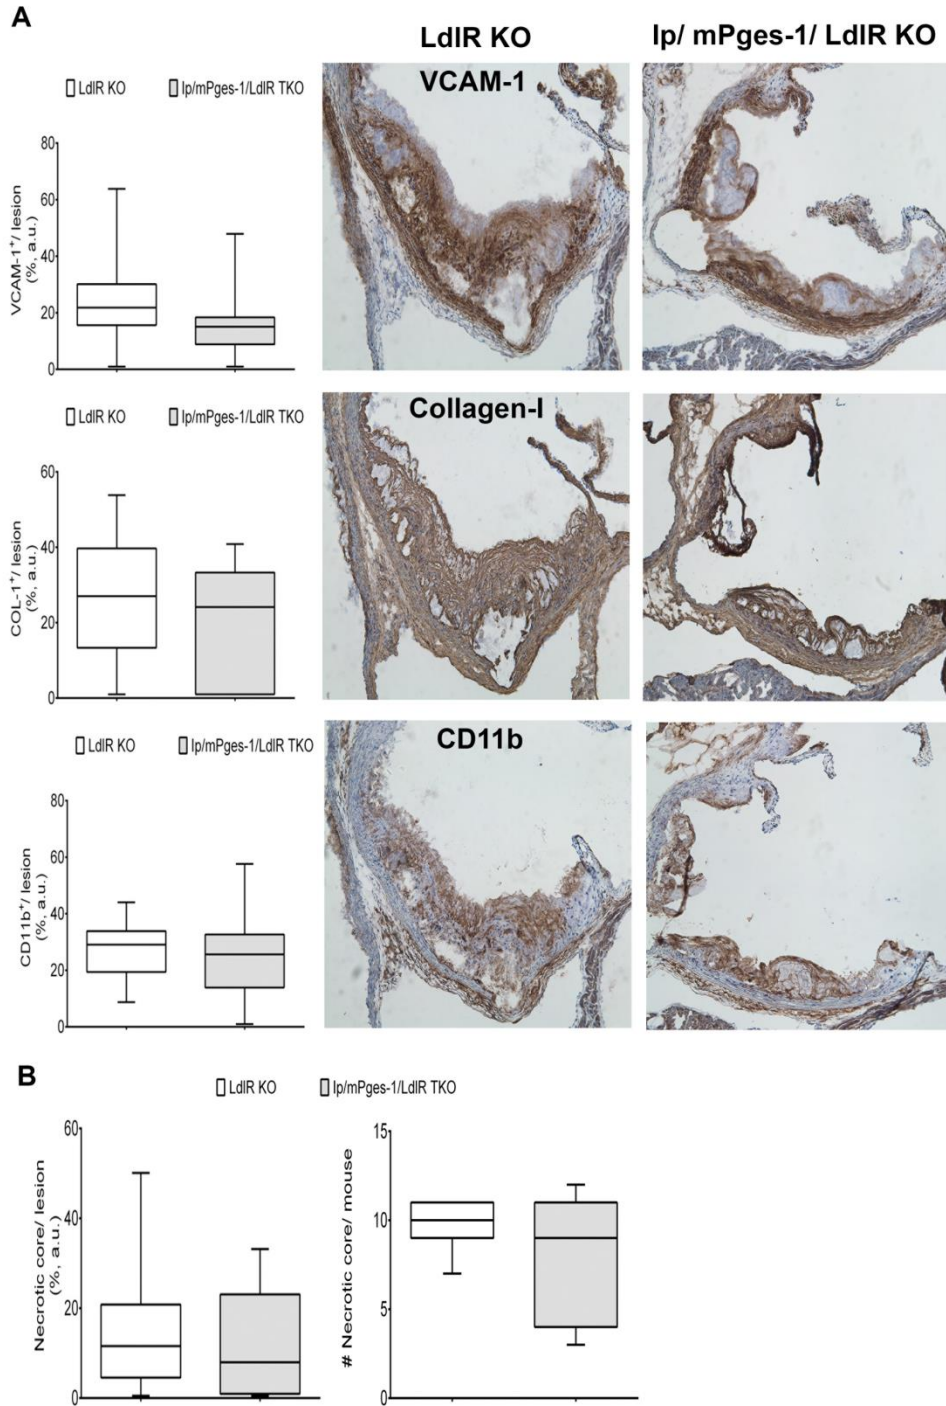

**Supplemental Figure 5. Morphometric consequences of prostacyclin receptor (Ip) and microsomal prostaglandin E synthase 1 (mPges-1) deletion on lesion development. A.**

Quantification of immunohistochemical staining of vascular cell adhesion molecule-1 (VCAM-

1), type-I collagen and CD11b in aortic roots of male LdlR KO and TKOs after feeding a HFD for 3 months is shown in parallel with their representative aortic root sections. B. Necrotic core area in lesions was analyzed as per lesion and per mouse are shown. A parametric t-test (2-tailed) revealed no significant effect of genotype on morphological staining for VCAM-1, type-I collagen and CD11b and lesional necrotic core areas. Data are expressed as means  $\pm$  SEMs. n=7 per genotype (21 lesions).
